# Supplementary material for: Simultaneous electrochemical determination of hydrazine and hydroxylamine by CuO doped in ZSM-5 nanoparticles as a new amperometric sensor
Source: Royal Society of Chemistry journal article supplement (doi:10.1039/c7nj02685d), 2017-01-01
Supplement: c7nj02685d1.pdf [file c7nj02685d1.pdf]

## Simultaneous electrochemical determination of hydrazine and hydroxylamine by CuO doped in ZSM-5 nanoparticles as a new amperometric sensor

Sedigheh Rostami<sup>a</sup>, Seyed Naser Azizi<sup>a</sup> and Sharam Ghasemi<sup>b</sup>

<sup>a</sup>Analytical division, Faculty of Chemistry, University of Mazandaran, Postal code 47416-95447, Babolsar, Iran

<sup>b</sup>Faculty of Chemistry, University of Mazandaran, Babolsar, Iran

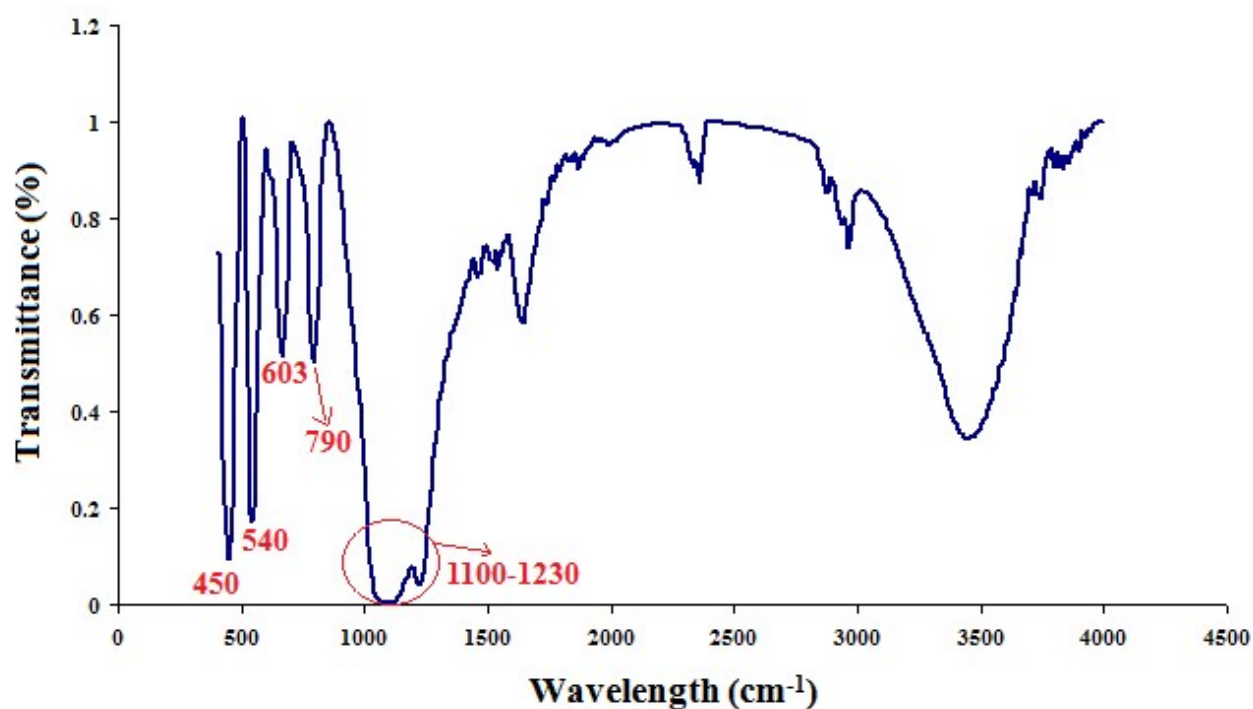

Fig. 1s FT-IR spectrum of CuO/ZSM-5 NPs
